# Supplementary material
Source: publisher site journal article supplement (https://www.dovepress.com/article/555070)
Supplement: Supplementary file 1 [file Supplementary%20Table.docx]

**Supplementary Table 1: Parameters derived by Brillouin Microscopy.**

| Brillouin Parameters | Definition |
| --- | --- |
| **Morphological parameters** | |
| Width of Top Plateau  (WTP, mm) | The width of the crystalline lens nucleus. |
| Width of Bottom Plateau (WBP, mm) | The width of the whole crystalline lens, which was defined as the region with higher BM, compared with the aqueous and vitreous possessing the lowest BM. |
| Bottom-Top (B-T, mm) | The difference of width between bottom and top plateau, referring to the total width of cortex or peripheral region. |
| Slope of Anterior Cortex (SAC, GPa/mm) | The axial gradient of Brillouin modulus in the anterior cortex, referring the viscoelasticity and thickness of anterior cortex. |
| Slope of Posterior Cortex (SPC, GPa/mm) | The axial gradient of Brillouin modulus in the posterior cortex, referring the viscoelasticity and thickness of posterior cortex. It should be noted that SPC is negative number in the gradient measurement. |
| **Biomechanical parameters** | |
| Height of Plateau (Height, GPa) | The Height and Brillouin modulus of the crystalline lens nucleus or top plateau, meaning the viscoelasticity of nucleus. |
